# Supplementary material for: Detailed Componential Characterization of Extractable Species with Organic Solvents from Wheat Straw
Source: Int J Anal Chem. 2017 Nov 1;2017:7305682. doi: 10.1155/2017/7305682 (PMC5676445; doi:10.1155/2017/7305682)
Supplement: Supplementary file 1 — Table S1: Compounds identified in EFPE with GC/MS. Table S2: Compounds identified in EFCS2 with GC/MS. Figure S1: TEM-EDS analysis of EFPE (images of sample Areas 1 and 2; and results for data points 1-6 for each Area, respectively). Figure S2: EPMA analysis of EFPE (image of sample area; and results for data points 1-8, respectively). [file 7305682.f1.docx]

Table S1. Compounds identified in EFPE with GC/MS.

| No. | Compounds | Formula | Relative contents (%) |
| --- | --- | --- | --- |
| **Alkanes** |  |  |  |
| **15** | Hexadecane | C16H34 | 0.019 |
| **17** | Nonadecane | C19H40 | 0.056 |
| **22** | Heneicosane | C21H44 | 0.256 |
| **24** | Docosane | C22H46 | 11.82 |
| **25** | Tricosane | C23H48 | 0.322 |
| **27** | Pentacosane | C25H52 | 9.982 |
| **31** | Heptacosane | C27H56 | 0.24 |
| **34** | Nonacosane | C29H60 | 2.132 |
| **Alkenes** |  |  |  |
| **8** | 2,10-Dimethyl-6-methyleneundecane | C14H28 | 0.018 |
| **14** | 1-Hexadecene | C16H32 | 0.064 |
| **21** | 1,19-Docosadiene | C20H38 | 0.285 |
| **26** | 1-Tetracosene | C24H48 | 0.695 |
| **32** | 7-Octacosene | C28H56 | 1.132 |
| **Arenes** |  |  |  |
| **1** | Benzene | C6H6 | 0.014 |
| **3** | Toluene | C7H8 | 0.012 |
| **Alcohols** |  |  |  |
| **20** | 1-Nonadecanol | C19H40O | 0.901 |
| **30** | Cholest-5-en-3-ol | C27H46O | 0.718 |
| **33** | Brassicasterol | C28H48O | 7.506 |
| **37** | 22,23-Dihydrostigmasterol | C29H50O | 16.705 |
| **43** | Taraxasterol | C30H50O | 1.554 |
| **Furan** |  |  |  |
| **2** | 2,5-Dimethylfuran | C6H8O | 0.01 |
| **Aldehydes** |  |  |  |
| **4** | Hexanal | C6H12O | 0.026 |
| **7** | Tridecanal | C13H26O | 0.021 |
| **19** | Octadecanal | C18H36O | 0.113 |
| **23** | Phytol | C20H40O | 0.168 |
| **Ketones** |  |  |  |
| 5 | 4-Hydroxy-4-methyl-2-pentanone | C6H12O2 | 0.085 |
| 9 | 7-Hexyloxepan-2-one | C12H22O2 | 0.37 |
| 11 | 3-Hexadecanone | C16H32O | 0.062 |
| 12 | 2-Heptadecanone | C17H34O | 0.158 |
| 16 | 5-Methyl-5-(4,8,12-trimethyltridecyl)dihydro-2(3H)-furanone | C21H40O2 | 0.157 |
| 35 | Pregn-4-ene-3,20-dione | C21H30O2 | 0.625 |
| 39 | Cholest-4-en-3-one | C27H44O | 5.089 |
| 40 | Rhapontisterone | C27H44O | 1.827 |
| 41 | 4,22-Stigmastadiene-3-one | C29H46O | 4.284 |
| 42 | Spinasterone | C29H46O | 0.303 |
| 44 | Stigmasta-4,24(28)-dien-3-one | C29H46O | 11.265 |
| 45 | Stigmasta-3,5-dien-7-one | C29H46O | 0.495 |
| 46 | Stigmast-4-en-3-one | C29H48O | 0.962 |
| 48 | Stigmastane-3,6-dione | C29H48O2 | 2.441 |
| **ONCs** |  |  |  |
| 6 | *N*,4-Dimethylbenzenesulfonamide | C8H11NO2S | 0.127 |
| 38 | *N*-[2-(4-Morpholinyl)ethyl)-α-hydroxybenzenebutanamide | C16H24N2O3 | 7.892 |
| **CA** |  |  |  |
| 18 | 2-((2-Ethylhexyloxy)carbonyl)benzoic acid |  | 0.241 |
| **Esters** |  |  |  |
| 10 | Butyl methyl phthalate | C13H16O4 | 0.028 |
| 13 | Dipropyl phthalate | C14H18O4 | 0.049 |
| 47 | Lup-20(29)-en-3-yl acetate | C32H52O2 | 0.36 |
|  |  |  |  |
| **Others** |  |  |  |
| 28 | 1-(Hexyloxy)octadecane | C24H50O | 0.337 |
| 29 | 4,4-Dimethyl-cholesta-6,22,24-triene | C29H46 | 0.126 |
| 36 | Stigmastan-3,5-diene | C29H48 | 7.746 |

Table S2. Compounds identified in EFCS2 with GC/MS.

| No. | Compounds | Formula | Relative contents (%) |
| --- | --- | --- | --- |
| **Arenes** |  |  |  |
| **1** | Benzene | C6H6 | 0.36 |
| **5** | Xylene | C8H10 | 0.185 |
| **9** | Acenaphthene | C12H10 | 0.307 |
| **14** | 9H-Fluorene | C13H10 | 0.225 |
| **Alcohols** |  |  |  |
| **15** | Rosifoliol | C15H26O | 0.411 |
| **21** | Sitosterol | C29H50O | 9.567 |
| **23** | 4,4-Dimethyl-cholest-5-en-3-ol | C29H50O | 1.991 |
| **Furans** |  |  |  |
| **2** | 2,5-Dimethylfuran | C6H8O | 0.224 |
| **11** | Dibenzofuran | C12H8O | 0.295 |
| **Esters** |  |  |  |
| **7** | Dimethyl phthalate | C10H10O4 | 0.438 |
| **13** | Diethyl phthalate | C12H14O4 | 0.292 |
| **17** | Butyl ethyl phthalate | C14H18O4 | 0.66 |
| **18** | Dibutyl phthalate | C16H22O4 | 0.513 |
| **19** | Isopropyl 2-phenyl-4,5-dihydrooxazole-4-carboxylate | C13H15NO3 | 0.756 |
| **22** | 3,7,11,15-Tetramethylhexadecyl nicotinate | C26H45NO2 | 11.556 |
| **Ketones** |  |  |  |
| **3** | 2-Hexanone | C6H12O | 1.032 |
| **4** | 4-Hydroxy-4-methyl-2-pentanone | C6H12O2 | 0.816 |
| **6** | Cyclohexanone | C6H10O | 0.342 |
| **8** | 5-Methylhex-4-en-3-one | C7H12O | 0.261 |
| **10** | 4-(4-Chlorophenyl)but-3-en-2-one | C10H9ClO | 0.202 |
| **16** | 6,10,14-Trimethylpentadecan-2-one | C18H36O | 0.868 |
| **20** | 5-Methyl-5-(4,8,12-trimethyltridecyl)dihydrofuran-2(3H)-one | C21H40O2 | 0.803 |
| **24** | 24-Ethyl-5α-cholesta-2,22-dien-6-one | C29H46O | 4.373 |
| **25** | Stigmast-4-en-3,6-dione | C29H46O2 | 13.14 |
| **26** | Stigmasta-4,24(28)-dien-3-one | C29H46O | 39.148 |
| **27** | 17-(1,5-Dimethylhexyl)-2-(1-hydroxyethylidene)-10,13-  dimethylhexadecahydrocyclopenta[a]phenanthren-3-one | C29H48O2 | 11.032 |
| **ONC** |  |  |  |
| **12** | 1-Methylpyrrolidin-2-one | C5H9NO | 0.201 |


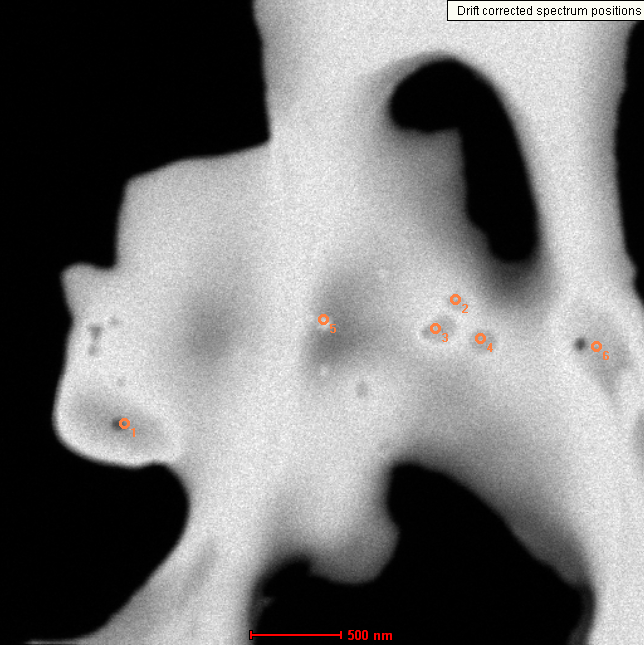


(Continued)

(Continued)

Figure S1. TEM-EDS analysis of EFPE. Area 1: TEM image shows the location of data points; following 6 EDS plots present the intensities of different atoms of each point.


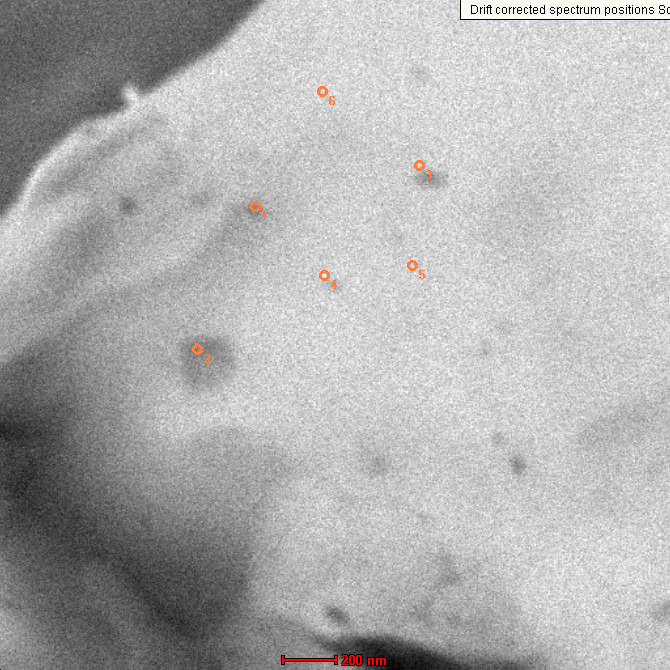


(Continued)

Figure S1. TEM-EDS analysis of EFPE. Area 2: TEM image shows the location of data points; following 6 EDS plots present the intensities of different atoms of each point.


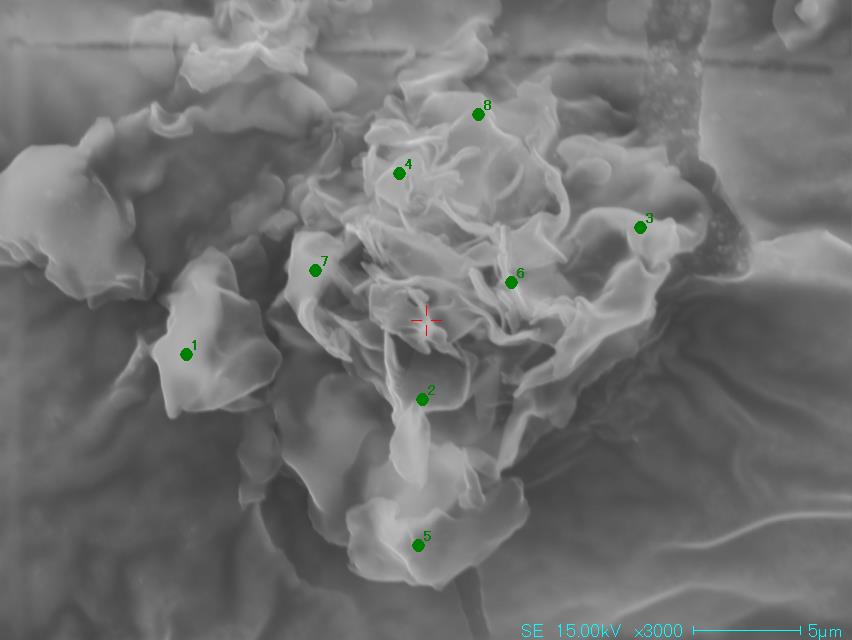


(Continued)


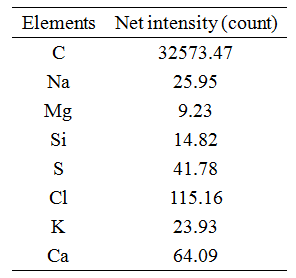

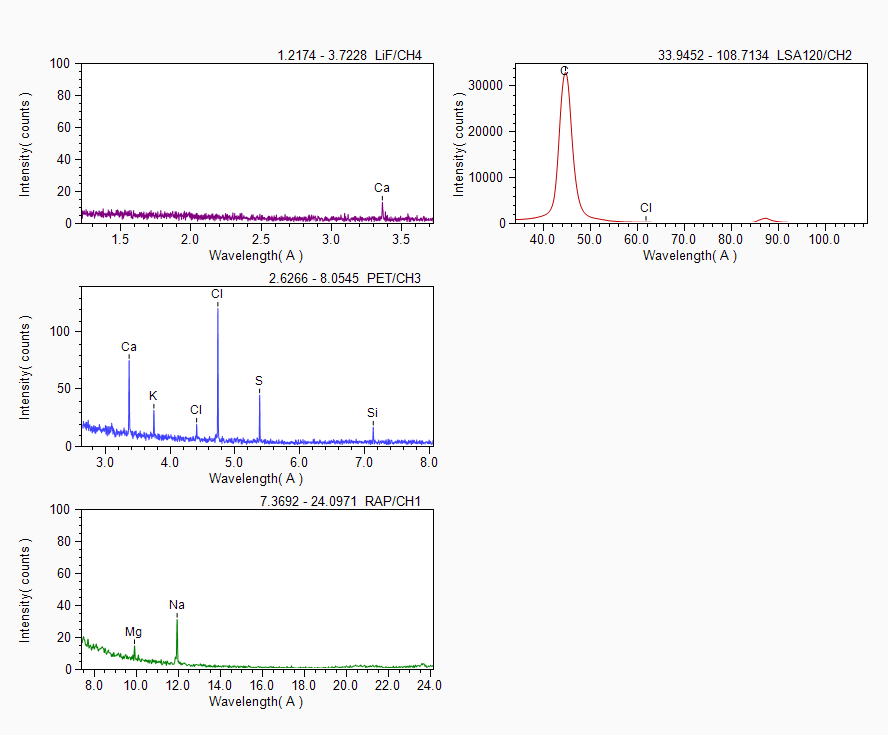


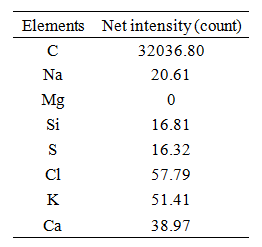

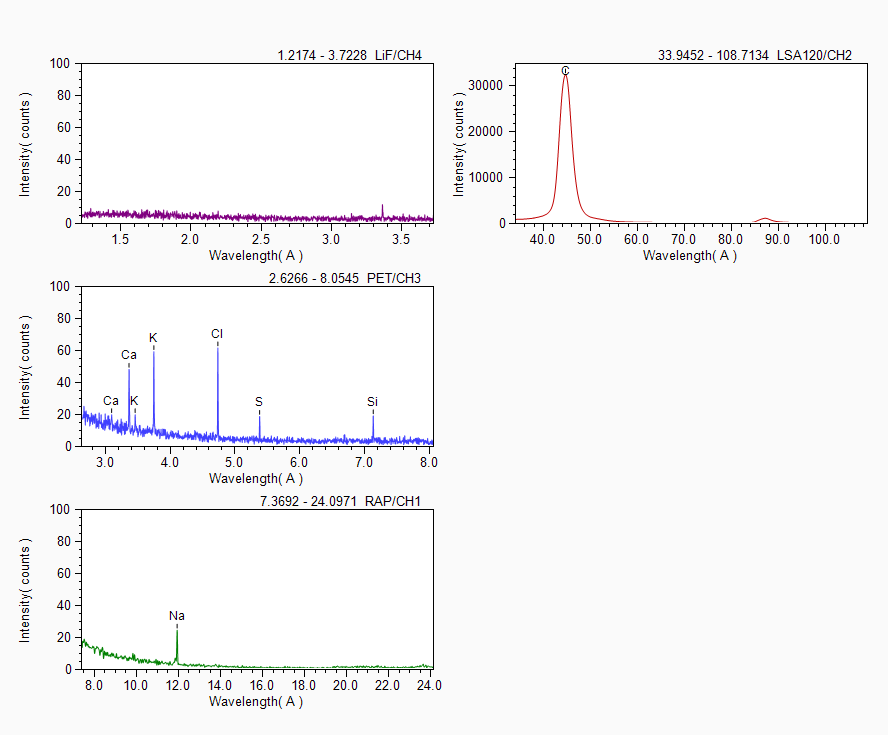


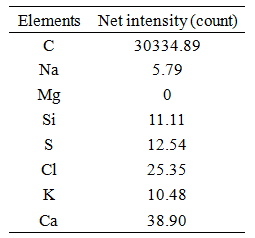

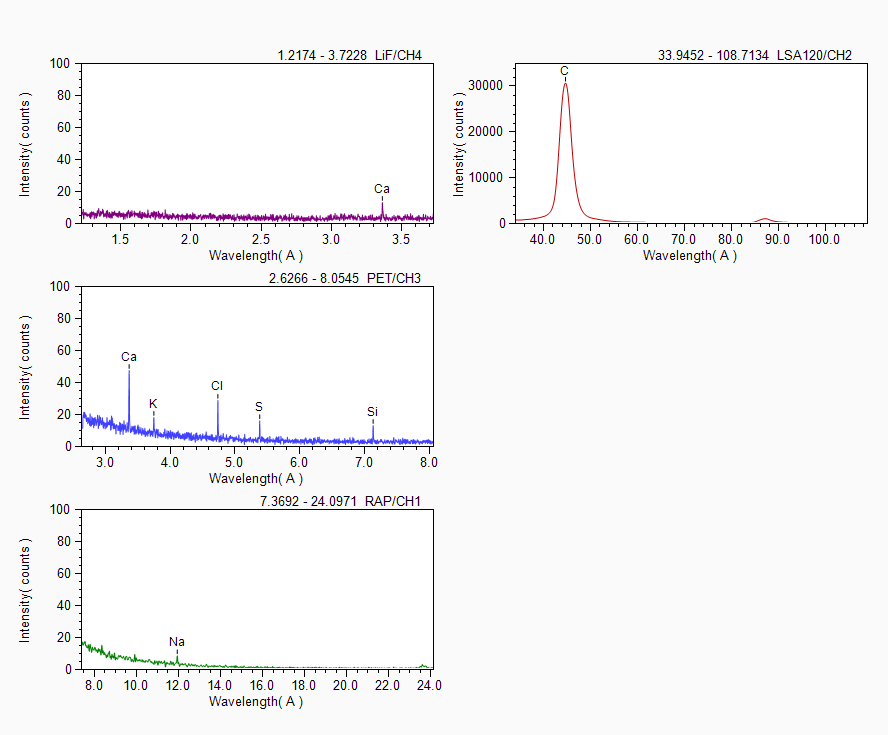


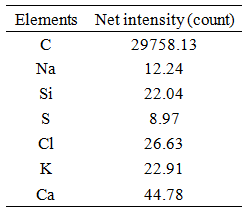

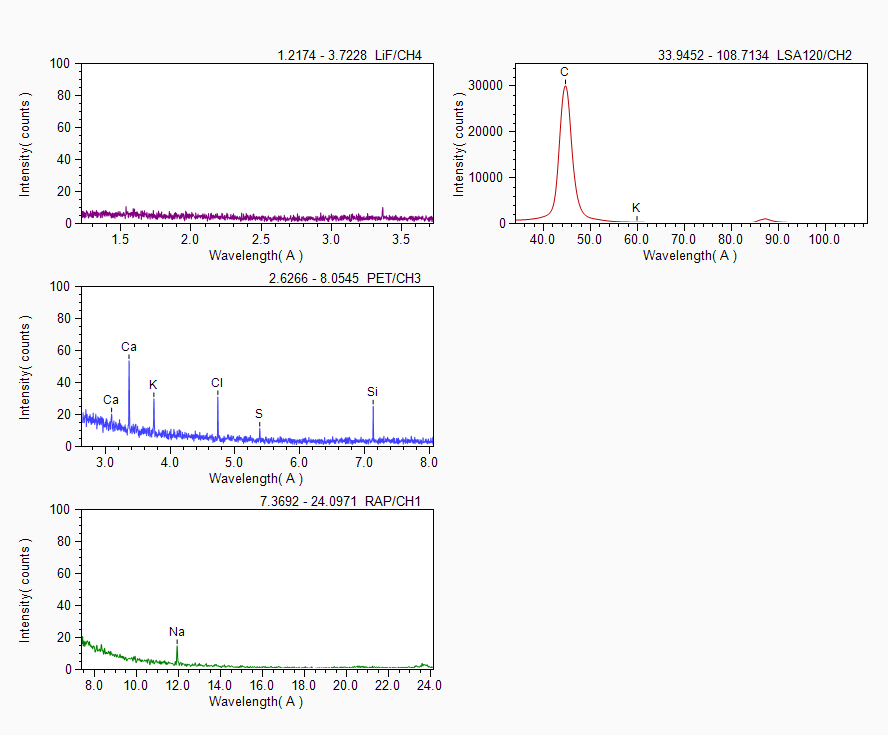


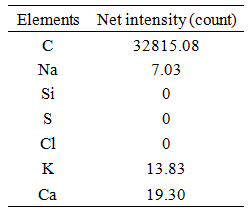

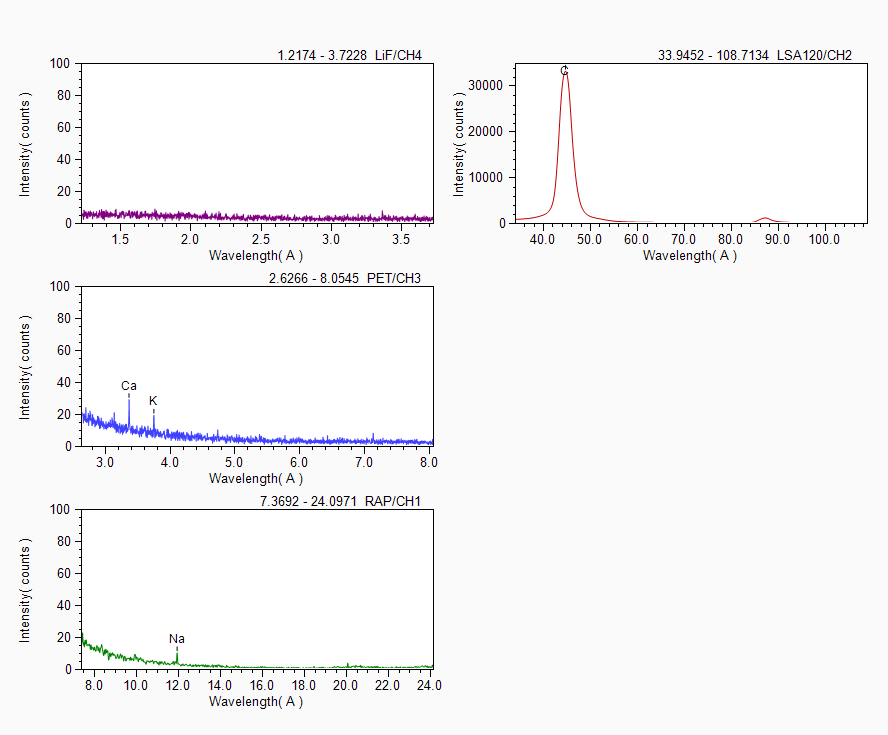


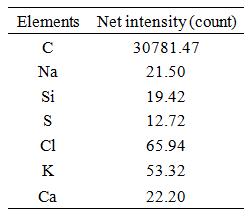

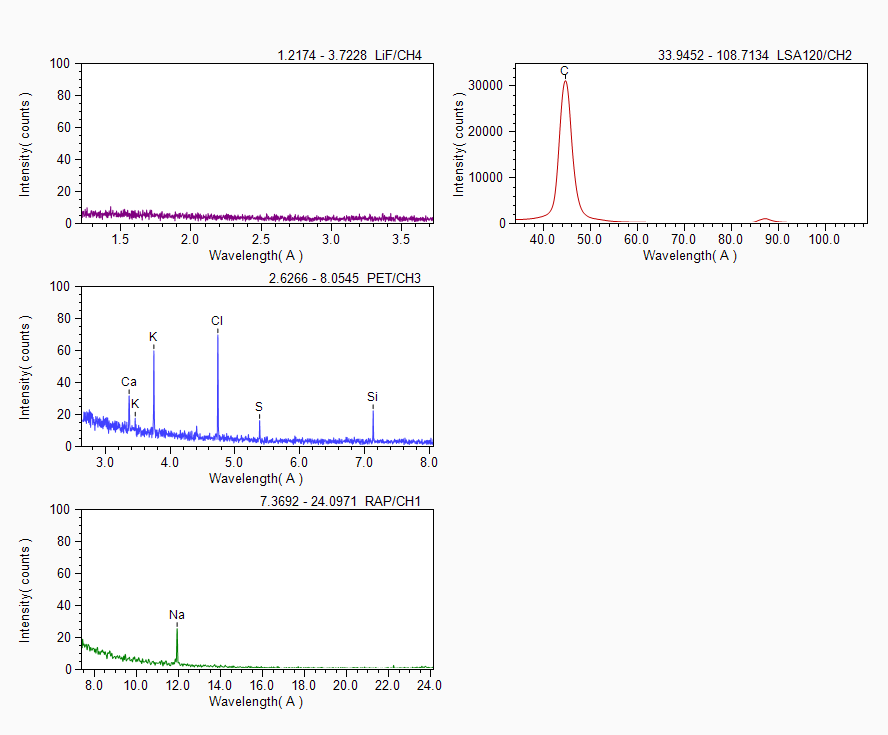


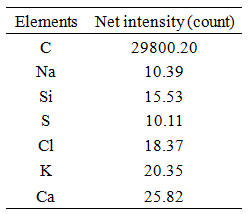

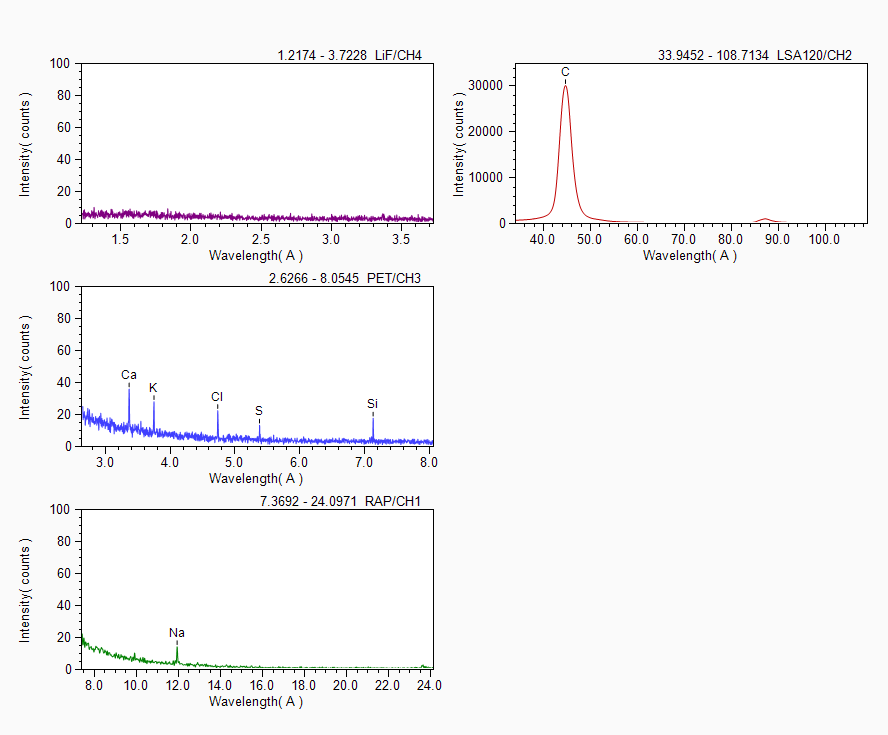


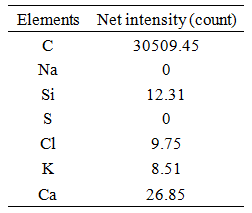

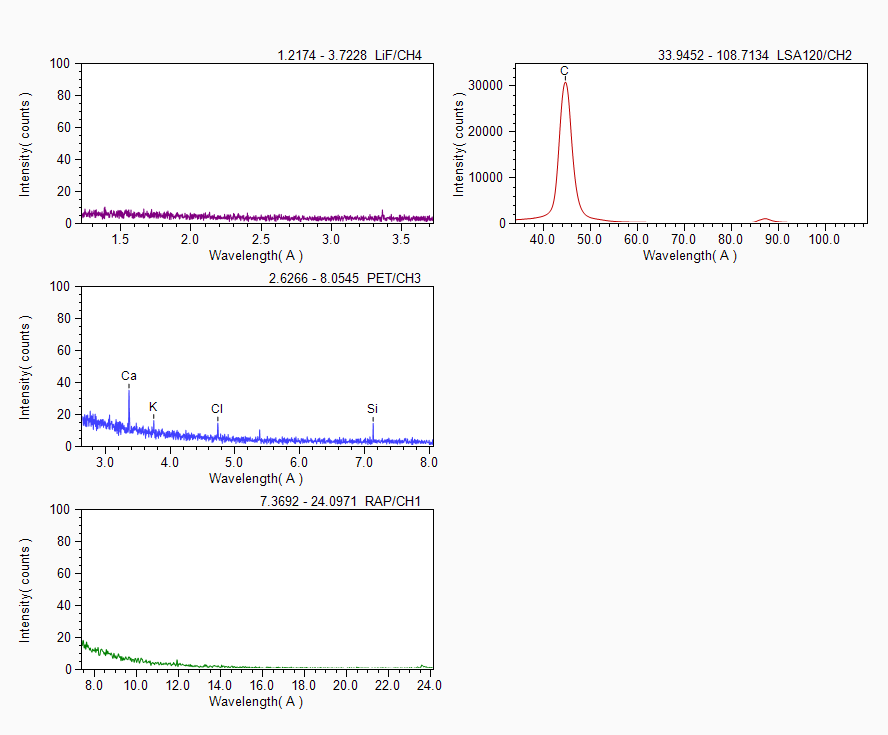


Figure S2. EPMA analysis of EFPE. (Image of sample area and the selected data points; the following figures are intensities for detecting elements for all the 8 data points.)
